# Supplementary material
Source: PubMed Central journal article supplement (PMC2626765)
Supplement: jlb.0108058_1.pdf [file jlb.0108058_1.pdf]

**Supplemental Table I.** Allergy history and eosinophil counts of blood donors.

| Donor # | Allergy history | Total eosinophils recovered from 320 mL whole blood (x 10 <sup>6</sup> ) |
|---------|-----------------|--------------------------------------------------------------------------|
| 1       | SA (NS)         | 64.5                                                                     |
| 2       | NA              | 19                                                                       |
| 3       | NA              | 10                                                                       |
| 4       | NA              | 24.9                                                                     |
| 5       | NA              | 26.3                                                                     |
| 6       | SA (S)          | 38.9                                                                     |
| 7       | NA              | 12.4                                                                     |
| 8       | NA              | 23.8                                                                     |
| 9       | MA (NS)         | 21.1                                                                     |
| 10      | AS              | 5                                                                        |
| 11      | NA              | 19.6                                                                     |
| 12      | SA (S)          | 18                                                                       |
| 13      | SA (S)          | 18.9                                                                     |
| 14      | NA              | 13.2                                                                     |
| 15      | SA (NS)         | 16                                                                       |
| 16      | RA (NS)         | 13                                                                       |
| 17      | NA              | 10.5                                                                     |
| 18      | SA (NS)         | 21                                                                       |

Allergy history determined through donor-answered questionnaire. NA, non-atopic; SA, seasonal allergies; AS, asthma; MA, mold allergy; RA, rabbit allergy; NS, non-symptomatic within one week of blood draw; S, symptomatic within 1 week of blood draw
