# Supplementary material
Source: PubMed Central journal article supplement (PMC2626765)
Supplement: jlb.0108058_2.pdf [file jlb.0108058_2.pdf]

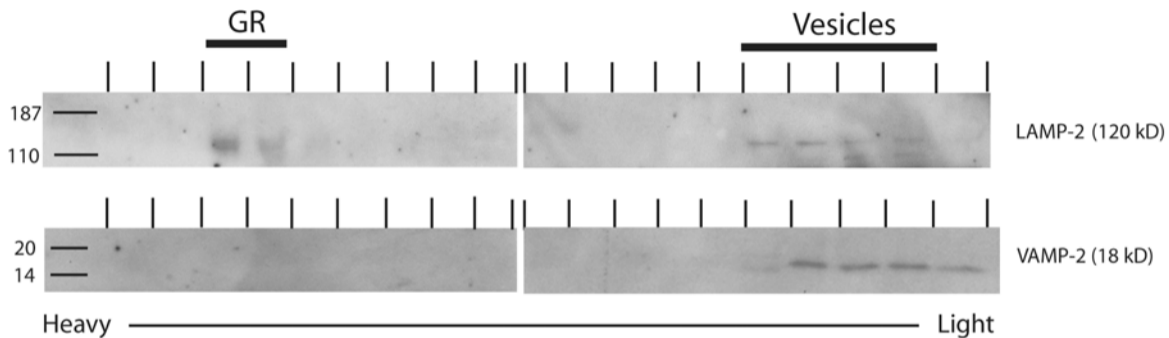

**Supplemental Fig. 1.** LAMP-2 and VAMP-2 reactivity identify vesicle localizations within subcellular fractions. Eosinophil subcellular fractionations, prepared as described in Materials and Methods, were analyzed by western analysis for expression of LAMP-2 (top panel) and VAMP-2 (bottom panel).

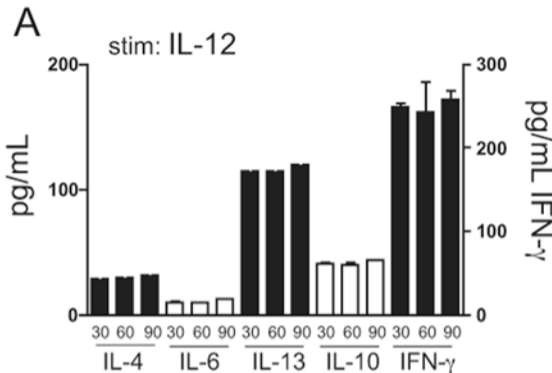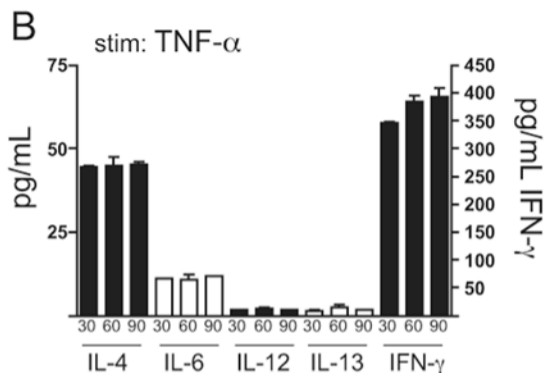

**Supplemental Fig. 2.** Equivalent levels of cytokines are detected within stimulated eosinophil supernatants at 30, 60 and 90 minutes of stimulation. Eosinophil cell free supernatants were analyzed by multiplex analysis following 30, 60 and 90 minutes of stimulation with 100 ng/mL rIL-12 (A) or rTNF- $\alpha$  (B). Means ( $\pm$ SD) for IFN- $\gamma$  secretion are plotted using the right y-axis, and means ( $\pm$ SD) for all other cytokines are plotted using the left y-axis values.

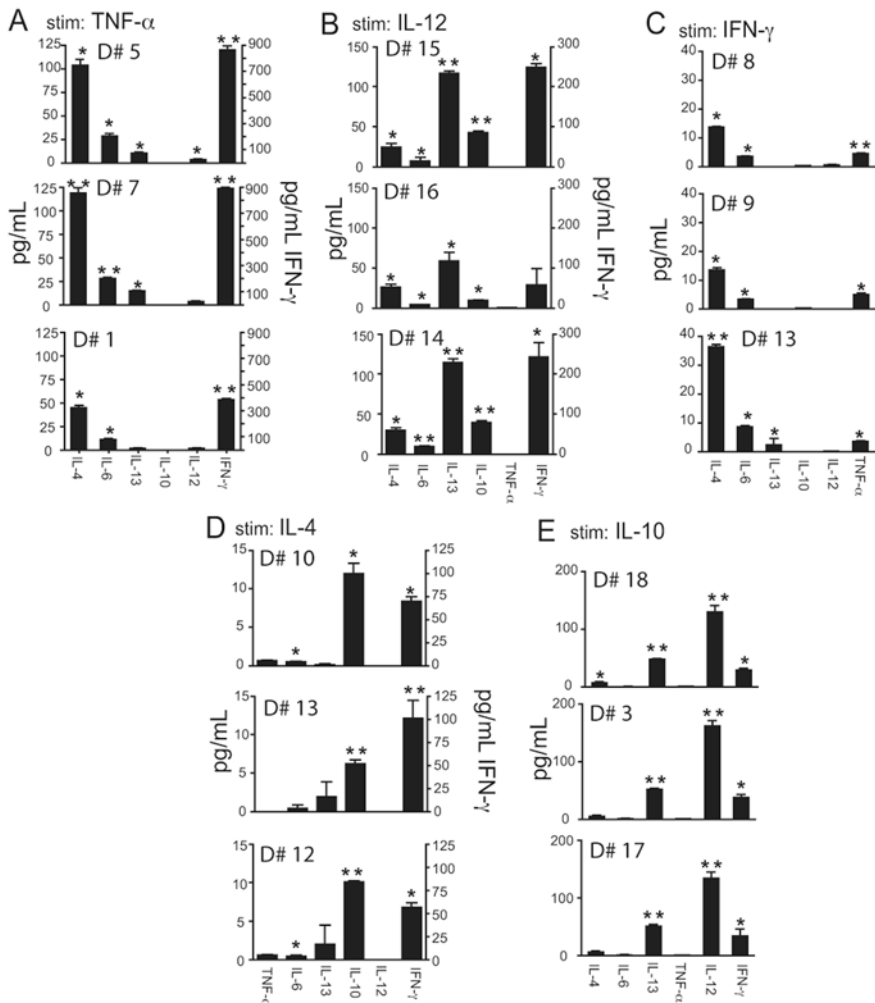

**Supplemental Fig. 3.** Stimulus-induced cytokine secretion profiles are similar between individual donors. Eosinophils ( $3 \times 10^6$  per mL) from three independent donors were stimulated with 100 ng/mL of TNF- $\alpha$  (A), IL-12 (B), IFN- $\gamma$  (C), IL-4 (D) or IL-10 (E) for 30 or 60 min at 37°C. Cell free supernatants were analyzed as above for the presence of IL-4, IL-6, IL-10, IL-13, TNF- $\alpha$ , IL-12(p70) and IFN- $\gamma$ . Data are presented as means ( $\pm$ SD). Donor numbers (D#) may be cross-referenced with Supplemental Table I. In A, B and D, the large overlay of IFN- $\gamma$  secretion is plotted using the right y-axis values, and all other cytokines are plotted using the left y-axis values. \*,  $p < 0.05$ ; \*\*,  $p < 0.001$  vs. non-stimulated controls.
